# Supplementary material for: Deciphering Soil Microbial Dynamics in Pennsylvania Grasslands with Goldenrods (Solidago sp)
Source: Research Square preprint supplement (doi:10.21203/rs.3.rs-5888910/v1), 2025-01-28
Supplement: Supplementary file 1 [file d2dc3e44e497f7caa25b59a8.docx]

Deciphering Soil Microbial Dynamics in Pennsylvania Grasslands with Goldenrods (*Solidago sp*).

Lily A. Kelleher1,2, Zachary Anderson2, Jeffery A. Stratford3, Caroline S. Fortunato2

1. Department of Biology, West Chester University, West Chester, PA, USA, 19383.
2. Department of Biology, Widener University, Chester, PA, USA, 19013.
3. Department of Biology and Earth Systems Science, Wilkes University, Wilkes-Barre, PA, 18766.

**Corresponding author:** Lily A. Kelleher ([lk925530@wcupa.edu](mailto:lk925530@wcupa.edu))

Supplementary Data:

**
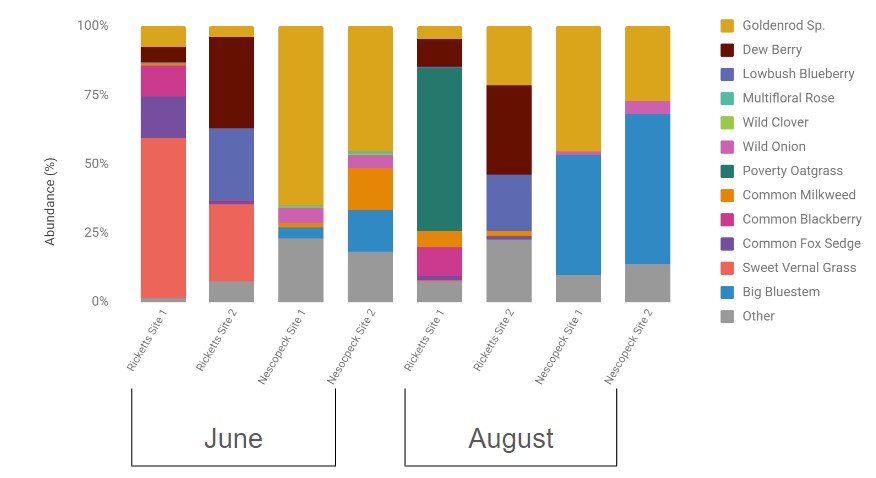
**

**Supplementary Fig.1:** **Percent plant species composition across grasslands.** Stacked bar chart representing the relative abundance of plant species at each sampling site.

*
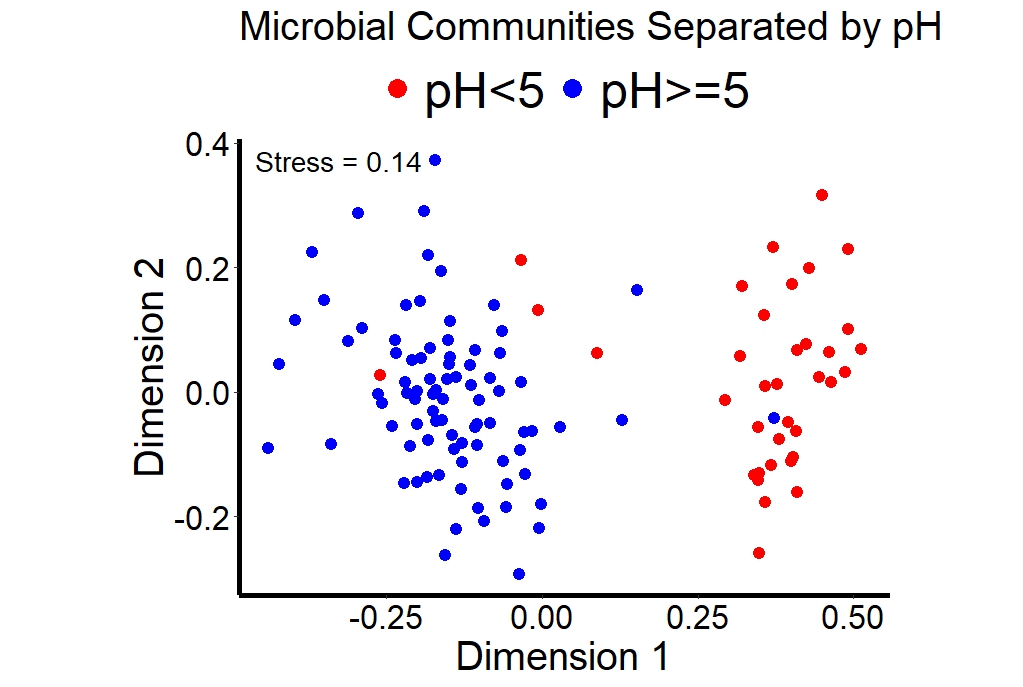
*

**Supplementary Fig.2: Microbial communities separated by soil pH.** This nMDS diagram shows all 120 soil samples. Each color presents a different pH range. There were 88 soil samples that had a pH of 5 or higher and 32 soil samples that had a pH below 5 (p=0.0265).


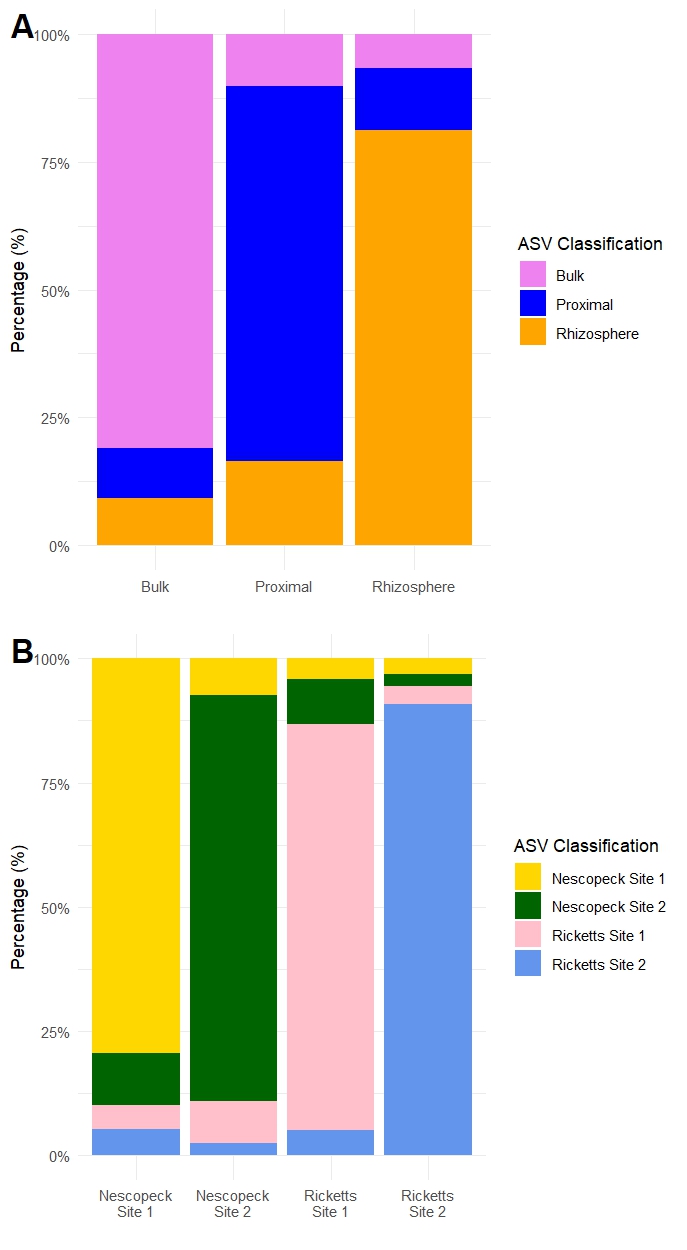


**Supplementary Fig.3: Percentage of sequences in ASVs classified by soil type and grassland.** **A)** ASVs classified by soil type of rhizosphere, proximal and bulk soil. **B)** ASVs classified by sampling sites of Nescopeck Site 1 and 2 and Ricketts Site 1 and 2.

| Comparison | df | SumOfSqs | R2 | F | p-value |
| --- | --- | --- | --- | --- | --- |
| **Soil Type Overall** | 2 | 1.955 | 0.051 | 3.114 | **0.002** |
| Bulk vs. Rhizosphere |  | 1.212 | 0.053 | 4.602 | **0.003** |
| Proximal vs. Rhizosphere |  | 1.039 | 0.038 | 3.288 | 0.2174 |
| Bulk vs. Proximal |  | 0.375 | 0.017 | 1.173 | **0.008** |
| **Soil Type pH Five and Above Overall** | 2 | 1.055 | 0.067 | 2.114 | **0.001** |
| Bulk vs. Rhizosphere |  | 1.054 | 0.534 | 3.654 | **0.003** |
| Proximal vs. Rhizosphere |  | 1.039 | 0.079 | 2.287 | 1 |
| Bulk vs. Proximal |  | 1.760 | 0.023 | 1.174 | **0.003** |
| **Soil Type pH Below Five Overall** | 2 | 1.345 | 0.124 | 1.897 | **0.042** |
| Bulk vs. Rhizosphere |  | 1.453 | 0.655 | 3.756 | 0.978 |
| Proximal vs. Rhizosphere |  | 1.113 | 0.101 | 3.908 | 0.365 |
| Bulk vs. Proximal |  | 1.895 | 0.124 | 2.009 | 0.071 |
| **Soil Type Ricketts Site 1** | 2 | 1.134 | 0.127 | 1.659 | 0.337 |
| Bulk vs. Rhizosphere |  | 1.054 | 0.129 | 2.008 | 0.790 |
| Proximal vs. Rhizosphere |  | 1.231 | 0.303 | 1.049 | 1 |
| Bulk vs. Proximal |  | 1.668 | 0.175 | 1.349 | 0.326 |
| **Soil Type Ricketts Site 2** | 2 | 2.156 | 0.087 | 0.127 | 0.263 |
| Bulk vs. Rhizosphere |  | 2.897 | 0.090 | 1.945 | 0.272 |
| Proximal vs. Rhizosphere |  | 1.896 | 0.655 | 1.227 | 1 |
| Bulk vs. Proximal |  | 2.113 | 0.122 | 1.808 | 0.683 |
| **Soil Type Nescopeck Site 1** | 2 | 1.945 | 0.145 | 1.767 | 0.098 |
| Bulk vs. Rhizosphere |  | 1.975 | 0.132 | 2.007 | 0.286 |
| Proximal vs. Rhizosphere |  | 1.046 | 0.769 | 1.977 | 1 |
| Bulk vs. Proximal |  | 3.077 | 0.349 | 0.986 | 0.225 |
| **Soil Type Nescopeck Site 3** | 2 | 2.007 | 0.023 | 0.875 | 0.151 |
| Bulk vs. Rhizosphere |  | 0.876 | 1.678 | 2.957 | 0.803 |
| Proximal vs. Rhizosphere |  | 1.876 | 0.675 | 1.745 | 0.301 |
| Bulk vs. Proximal |  | 0.335 | 0.007 | 0.546 | 0.904 |
| **Soil Type Ricketts Site 1 & 2** | 2 | 0.586 | 0.022 | 0.896 | 0.552 |
| Ricketts bulk vs. rhizosphere |  | 0.341 | 0.018 | 1.054 | 0.935 |
| Ricketts bulk vs proximal |  | 0.312 | 0.017 | 0.971 | 1 |
| Ricketts proximal vs rhizosphere |  | 0.212 | 0.014 | 0.628 | 1 |
| **Soil Type Nescopeck Site 1 & 3** | 2 | 0.712 | 0.078 | 1.486 | **0.022** |
| Nescopeck bulk vs. rhizosphere |  | 0.283 | 0.043 | 1.122 | 0.804 |
| Nescopeck bulk vs proximal |  | 0.402 | 0.064 | 1.706 | 0.091 |
| Nescopeck proximal vs rhizosphere |  | 0.388 | 0.078 | 1.703 | 0.099 |
| June vs. August | 1 | 0.883 | 0.023 | 2.756 | **0.003** |
| 2021 vs. 2022 | 1 | 0.484 | 0.013 | 1.497 | 0.083 |
| pH Overall  High pH (Above 5) vs. Low pH (Below 5) | 1 | 1.109 | 0.054 | 1.846 | **0.027** |
| **Site Overall** | 3 | 1.485 | 0.038 | 1.544 | **0.018** |
| Ricketts Site 1 vs. Ricketts Site 2 |  | 0.638 | 0.024 | 1.968 | 0.091 |
| Ricketts Site 1 vs. Nescopeck Site 2 |  | 0.422 | 0.020 | 1.344 | 0.783 |
| Ricketts Site 1 vs. Nescopeck Site 1 |  | 0.520 | 0.025 | 1.635 | 0.315 |
| Ricketts Site 2 vs. Nescopeck Site 2 |  | 0.463 | 0.026 | 1.432 | 0.659 |
| Ricketts Site 2 vs. Nescopeck Site 1 |  | 0.454 | 0.026 | 1.380 | 0.692 |
| Nescopeck Site 2 vs. Nescopeck Site 1 |  | 0.374 | 0.032 | 1.197 | 1 |
| **Site Overall Bulk Soil Only** | 3 | 5.103 | 0.365 | 2.951 | **0.004** |
| Ricketts Site 1 Bulk vs. Ricketts Site 2 Bulk |  | 1.372 | 0.332 | 6.460 | **0.006** |
| Ricketts Site 1 Bulk vs. Nescopeck Site 2 Bulk |  | 0.442 | 0.154 | 1.999 | **0.006** |
| Ricketts Site 1 Bulk vs. Nescopeck Site 1 Bulk |  | 0.401 | 0.139 | 1.769 | **0.006** |
| Ricketts Site 2 Bulk vs. Nescopeck Site 2Bulk |  | 0.613 | 0.378 | 2.427 | **0.001** |
| Ricketts Site 2 Bulk vs. Nescopeck Site 1 Bulk |  | 0.639 | 0.407 | 2.748 | **0.006** |
| Nescopeck Site 2 Bulk vs. Nescopeck Site 1 Bulk |  | 0.871 | 0.604 | 6.011 | **0.043** |
| **Site Overall Proximal Soil Only** | 3 | 1.193 | 0.109 | 4.046 | **0.001** |
| Ricketts Site 1 Proximal vs. Ricketts Site 2 Proximal |  | 1.370 | 0.148 | 4.684 | **0.001** |
| Ricketts Site 1 Proximal vs. Nescopeck Site 2 Proximal |  | 0.822 | 0.134 | 3.262 | **0.008** |
| Ricketts Site 1 Proximal vs. Nescopeck Site 1 Proximal |  | 1.478 | 0.281 | 6.252 | **0.001** |
| Ricketts Site 2 Proximal vs. Nescopeck Site 2 Proximal |  | 0.834 | 0.130 | 0.899 | **0.028** |
| Ricketts Site 2 Proximal vs. Nescopeck Site 1 Proximal |  | 0.871 | 0.601 | 6.011 | **0.006** |
| Nescopeck Site 2 Proximal vs. Nescopeck Site 1 Proximal |  | 0.842 | 0.618 | 6.463 | 0.293 |
| **Site Overall Rhizosphere Soil Only** | 3 | 0.983 | 0.087 | 3.156 | **0.001** |
| Ricketts Site 1 Rhizosphere vs. Ricketts Site 2 Rhizosphere |  | 2.473 | 0.259 | 9.783 | **0.006** |
| Ricketts Site 1 Rhizosphere vs. Nescopeck Site 2 Rhizosphere |  | 0.503 | 0.085 | 1.932 | **0.008** |
| Ricketts Site 1 Rhizosphere vs. Nescopeck Site 1 Rhizosphere |  | 1.512 | 0.294 | 6.235 | **0.002** |
| Ricketts Site 2 Rhizosphere vs. Nescopeck Site 2 Rhizosphere |  | 0.114 | 0.312 | 0.907 | **0.006** |
| Ricketts Site 2 Rhizosphere vs. Nescopeck Site 1 Rhizosphere |  | 0.125 | 0.243 | 0.641 | **0.003** |
| Nescopeck Site 2 Rhizosphere vs. Nescopeck Site 1 Rhizosphere |  | 0.174 | 0.343 | 1.045 | 0.249 |

**Supplementary Table 1: P-values from all permanova tests.** Values highlighted in bold are significant values.

| Comparison | p-value | df | chi-squared |
| --- | --- | --- | --- |
| Soil Type (Bulk, Proximal, Rhizosphere) | 0.4234 | 2 | 1.7189 |
| Ricketts vs. Nescopeck | 0.07934 | 1 | 3.0784 |
| June vs. August | 0.2253 | 1 | 1.47 |
| Sampling Site | 0.1281 | 3 | 5.7763 |
| 2021 vs. 2022 | 0.1479 | 1 | 2.0938 |
| pH | 0.2343 | 1 | 11.574 |

**Supplementary Table 2:** **P-values for alpha diversity tests.** Significance values for Shannon diversity were calculated using a Kruskal-Wallis test.

| Comparison | p-value | df | chi-squared |
| --- | --- | --- | --- |
| Soil Type (Bulk, Proximal, Rhizosphere) | 0.5214 | 2 | 1.3024 |
| Ricketts vs. Nescopeck | 0.1849 | 1 | 1.7577 |
| June vs. August | 0.69 | 1 | 0.15912 |
| Sampling Site | 0.2664 | 3 | 2.6455 |
| 2021 vs. 2022 | 0.4979 | 1 | 0.45947 |
| pH | 0.3423 | 1 | 8.6735 |

**Supplementary Table 2:** **P-values for alpha diversity tests.** Significance values for species richness were calculated using a Kruskal-Wallis test.
